# Supplementary material
Source: Springer Nature journal article supplement (https://www.springermedizin.de/resource/supplementary/12939_2012_337_MOESM1_ESM.pdf/9550936)

(a) health care utilization

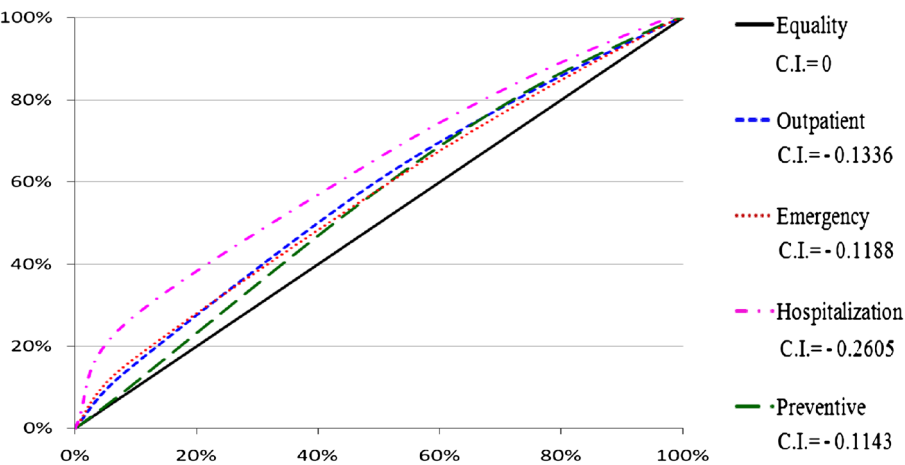

(b) health care expenditure

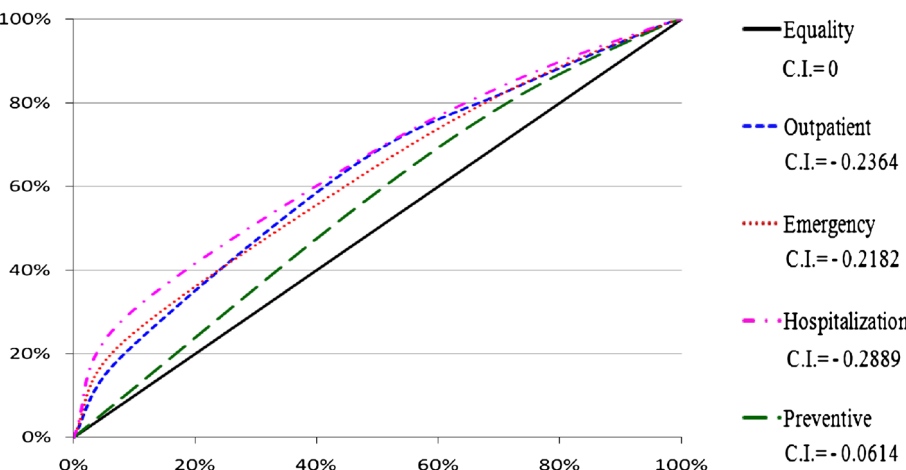

Supplement: MOESM1 [file 9550936]
